# Supplementary material
Source: MDPI journal article supplement (https://www.mdpi.com/2073-4395/13/2/445)
Supplement: s1 [file s1]

**Table S1.** List of environmental covariates for digital soil mapping.

| Type of index   | Covariate name (abbreviation)                               | Definition                                                                                               | Reference |
|-----------------|-------------------------------------------------------------|----------------------------------------------------------------------------------------------------------|-----------|
| Terrain indices | Altitude (DEM)                                              | Height over sea level                                                                                    |           |
|                 | Slope                                                       | Gradient of line is changing of elevation in the direction and steepness                                 |           |
|                 | Aspect (ASP)                                                | Direction of the line of the steepest descent                                                            |           |
|                 | Curvature                                                   | The degree to which a curve deviates from a straight line                                                | [77]      |
|                 | Plan curvature (Plancurv)                                   | Rate of change of aspect along a contour                                                                 |           |
|                 | Profile curvature (Profcurv)                                | Rate of change of slope down a slope line                                                                |           |
|                 | Convergence                                                 | Highlights the convergent areas as channels and divergent areas as ridges.                               |           |
|                 | Analytical hillshade                                        | Angle between the surface and the incoming light beams                                                   | [50]      |
|                 | Channel network                                             | The interpolated channel network base level elevations                                                   | [77]      |
|                 | Vertical distance to channel network (VDTCN)                | Calculates the vertical distance to a channel network base level                                         | [50]      |
|                 | Topographic roughness (TRI)                                 | Measures terrain ruggedness                                                                              |           |
|                 | Stream power (SPI)                                          | A measure of the topographic control on the sediment transport (USLE's LS factor)                        | [78]      |
|                 | Topographic wetness index (TWI)                             | A measure of the topographic control on soil wetness or the ratio                                        |           |
|                 | Multi-resolution valley bottom flatness index (MRVBF)       | Measure of flatness and lowness                                                                          |           |
|                 | Multi-resolution of ridge top flatness index (MRRTF)        | Measure of flatness and lowness                                                                          | [77]      |
|                 | Topographic position (TPI)                                  | Difference between a cell elevation value and the average elevation of the neighborhood around that cell | [50]      |
|                 | Mass balance (MBI)                                          | Balance between soil mass deposited and eroded                                                           |           |
|                 | Wind effect                                                 | Dimensionless index indicating areas exposed to wind                                                     | [79]      |
|                 | Valley depth                                                | The vertical distance to a channel network base level                                                    |           |
| Remote sensing  | Relative slope position (RSP)                               | The position of one point relative                                                                       | [50]      |
|                 | Terrain surface texture (Texture)                           | The geometrical irregularities present at a surface or the nested-means terrain classification           |           |
|                 | Salinity (SI)                                               | $\sqrt{B2 \times B4}$                                                                                    |           |
|                 | Salinity1                                                   | $B2/B4$                                                                                                  |           |
|                 | Salinity2                                                   | $(B2-B4)/(B2+B4)$                                                                                        |           |
|                 | Salinity3                                                   | $(B3 \times B4)/B2$                                                                                      |           |
|                 | Salinity4                                                   | $(B2 \times B4)/B3$                                                                                      | [80]      |
|                 | Salinity5                                                   | $(B2 \times B4)/B3$                                                                                      |           |
|                 | Salinity6                                                   | $(B4 \times B8A)/B3$                                                                                     |           |
|                 | Normalized difference salinity (NDSI)                       | $(B4-B8A)/(B4+B8A)$                                                                                      |           |
|                 | Salinity Index-T (SI-T)                                     | $(B4/B8A)/100$                                                                                           |           |
|                 | (SI1)                                                       | $\sqrt{B3^2 + B4^2 + B8A^2}$                                                                             | [81]      |
|                 | (SI2)                                                       | $\sqrt{B3^2 + B4^2}$                                                                                     | [82]      |
|                 | Soil moisture monitoring (SMMI)                             | $\sqrt{B8A^2 + B11^2} / \sqrt{2}$                                                                        |           |
|                 | Visible and shortwave drought (VSDI)                        | $1-(B12+B4-2 \times B2)$                                                                                 |           |
|                 | Normalized difference water (NDWI)                          | $(B8A-B11)/(B8A+B11)$                                                                                    | [83]      |
|                 | Redness (RI)                                                | $(B4)^2/(B3)^2$                                                                                          |           |
|                 | Brightness (BI)                                             | $\sqrt{(B4^2 + B3^2 + B2^2)} / 3$                                                                        |           |
|                 | Second brightness (BI2)                                     | $\sqrt{(B4^2 + B3^2 + B8A^2)} / 3$                                                                       |           |
|                 | Carbonate (CaI)                                             | $B4/B3$                                                                                                  | [84]      |
|                 | Ferrous (FeI)                                               | $B4/SWIR1$                                                                                               |           |
|                 | Clay (ClayI)                                                | $SWIR1/SWIR2$                                                                                            |           |
|                 | Saturation (SI)                                             | $(B4-B2)/(B4+B2)$                                                                                        |           |
|                 | Coloration (CI)                                             | $(B4-B3)/(B4+B3)$                                                                                        |           |
|                 | Hue (HI)                                                    | $(2 \times B4-B2)/(B4+B2)$                                                                               | [83]      |
|                 | Grain size (GSI)                                            | $(B4-B2)/(B4+B3+B2)$                                                                                     |           |
|                 | Normalized difference (Geol)                                | $(SWIR1-SWIR2)/(SWIR1+SWIR2)$                                                                            |           |
|                 | Normalized difference (CalcI)                               | $(SWIR1-B3)/(SWIR1+B3)$                                                                                  |           |
|                 | Intensity1                                                  | $(B3+B4)/2$                                                                                              |           |
|                 | Intensity2                                                  | $(B3+B4+B8A)/2$                                                                                          | [80]      |
|                 | Infrared percentage vegetation (IPVI)                       | $B8/(B8+B4)$                                                                                             |           |
|                 | Moisture stress (MSI)                                       | $SWIR1/B8$                                                                                               |           |
|                 | Normalized multiband drought (NMDI)                         | $\frac{B8A-(B11-B12)}{B8A+(B11+B12)}$                                                                    | [51]      |
|                 | Normalized shortwave-infrared difference SM (NSDSI3)        | $(B11-B12)/(B11+B12)$                                                                                    |           |
|                 | Perpendicular drought index 311 (PD311)                     |                                                                                                          |           |
|                 | Perpendicular drought index 322 (PD322)                     | $(B4-B3)/(B4+B3)$                                                                                        | [85]      |
|                 | Enhanced vegetation (EVI)                                   | $\frac{2.5 \times (B8A-B4)}{(B8A+6 \times B4-7.5 \times B2+1)}$                                          | [86]      |
|                 | Normalized difference vegetation index red-edge 1 (NDVIrel) | $(B8A-B5)/(B8A+B5)$                                                                                      |           |

|                                                             |                                                                                                                                                                |       |      |
|-------------------------------------------------------------|----------------------------------------------------------------------------------------------------------------------------------------------------------------|-------|------|
| Normalized difference vegetation index red-edge 2 (NDVire2) | $(B8A-B6)/(B5+B6)$                                                                                                                                             |       |      |
| Normalized difference red-edge 1 (NDre1)                    | $(B6-B5)/(B6+B5)$                                                                                                                                              |       |      |
| Normalized difference red-edge 2 (NDre2)                    | $(B7-B5)/(B7+B5)$                                                                                                                                              |       |      |
| Triangular chlorophyll (TCIrel)                             | $1.2 \times (B5 - B3) - 1.5 \times (B4 - B3) \times \sqrt{\frac{B5}{B4}}$                                                                                      |       |      |
| Transformed vegetation (TVI)                                | $\sqrt{\left(\frac{B8-B4}{B8+B4} + 0.5\right)} \times 100$                                                                                                     |       |      |
| Weighted difference vegetation (WDVI)                       | $B8 - (B8/B4) \times B4$                                                                                                                                       |       |      |
| Soil adjusted total vegetation (SATVI)                      | $\left(\frac{B11-B4}{B11+B4+L}\right) \times (1+L) - \frac{B12}{2}$                                                                                            |       |      |
| Soil adjusted vegetation index (SAVI)                       | $\frac{(B8-B4) \times (1+L)}{(B8-B4+L)}$                                                                                                                       | L=1   | [87] |
| Optimized soil-adjusted vegetation (OSAVI)                  | $(B8-B4)/(B8+B4+0.16)$                                                                                                                                         | L=0.5 | [88] |
| Normalized difference vegetation (NDVI)                     | $(B8-B4)/(B8A+B4)$                                                                                                                                             |       | [89] |
| Ratio vegetation (RVI)                                      | $(B8/B4)$                                                                                                                                                      |       | [90] |
| Difference vegetation (DVI)                                 | $(B8-B4)$                                                                                                                                                      |       |      |
| Green-Red vegetation (GRVI)                                 | $(B3-B4)/(B3+B4)$                                                                                                                                              |       |      |
| Green normalized difference vegetation (GNDVI)              | $(B8-B3)/(B8+B3)$                                                                                                                                              |       | [86] |
| Modified soil adjusted vegetation (MSAVI)                   | $\frac{2 \times B4 + 1 - \sqrt{(2 \times B8A + 1)^2 - 8 \times (B8A - B4)}}{2}$                                                                                |       |      |
| Land use map                                                |                                                                                                                                                                |       |      |
| Parent material                                             | Geology map                                                                                                                                                    |       |      |
| Parent material, topography, soil                           | Landform map                                                                                                                                                   |       |      |
| Groundwater quality parameters                              | HCO <sub>3</sub> <sup>-</sup> , Cl <sup>-</sup> , SO <sub>4</sub> <sup>2-</sup> , Na <sup>+</sup> , Ca <sup>2+</sup> , Mg <sup>2+</sup> , EC, pH, SAR, and TDS |       |      |

**Sentinel 2 Bands:** B2= Blue (492.4 nm), B3= Green (559.8 nm), B4= Red (664.6 nm), B5= Vegetation Red Edge (704.1 nm), B6 = Vegetation Red Edge (740.5 nm), B7= Vegetation Red Edge (782.8 nm), B8=NIR (832.8 nm), B8A= Narrow NIR (864.7 nm), B10=SWIR1 (1373.5 nm), B11= SWIR2 (1613.7 nm).
